# Supplementary material for: Aqueous synthesis of Ag+doped CdS quantum dots and its application in H2O2sensing
Source: Royal Society of Chemistry journal article supplement (doi:10.1039/c2ay26063h), 2012-11-14

## Aqueous synthesis of Ag<sup>+</sup> doped CdS quantum dots and its application in H<sub>2</sub>O<sub>2</sub> sensing

Lin Lin<sup>a</sup>, Yaqiong Wen<sup>a</sup>, Yanxia Liang<sup>a</sup>, Na Zhang<sup>b</sup>, Dan Xiao<sup>\* a,b</sup>

**Fig. S1.** The response behavior of H<sub>2</sub>O<sub>2</sub> sensing system, CdS-Ag<sub>2</sub>S QDs prepared at different pH (a) 5.6, (b) 7.2, (c) 10.2, (d) 11.2, plot of the luminescence ratio  $(I_{F0}-I_F)/I_{F0}$  versus lgC of different CdS-Ag<sub>2</sub>S QDs.

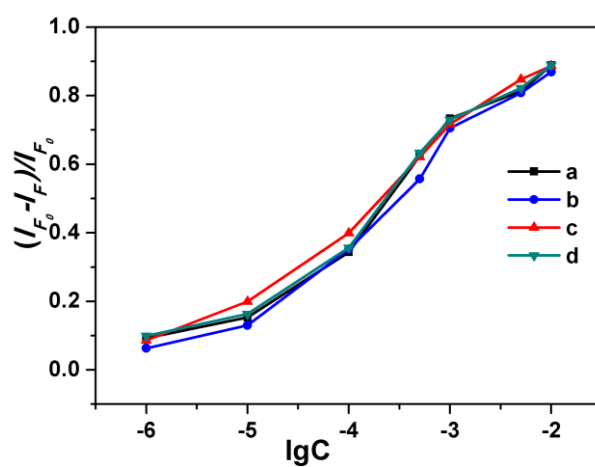

**Fig. S2.** (A) Fluorescence spectra of CdS-Ag<sub>2</sub>S QDs prepared at different ratio of [Cd<sup>2+</sup>] / [S<sup>2-</sup>], (a) 0.5:1, (b) 1:1, (c) 1.5:1, (d) 2:1, (e) 2.5:1, (f) 3:1. (B) Fluorescence spectra of CdS-Ag<sub>2</sub>S QDs prepared at different concentration of reactants, (a) 3×10<sup>-3</sup>, (b) 3×10<sup>-4</sup>, (c) 3×10<sup>-5</sup>, (d) 3×10<sup>-6</sup>. (C) Fluorescence spectra of CdS-Ag<sub>2</sub>S QDs containing various molar ratios of Ag to CdS (a) 1%, (b) 3%, (c) 5%, (d) 10%, (e) 15%, (f) 25%. (D) Fluorescence spectra of CdS-Ag<sub>2</sub>S QDs prepared at different reaction time, (a) 20 min, (b) 40 min, (c) 60 min, (d) 90 min, (e) 120 min, (f) 180 min.

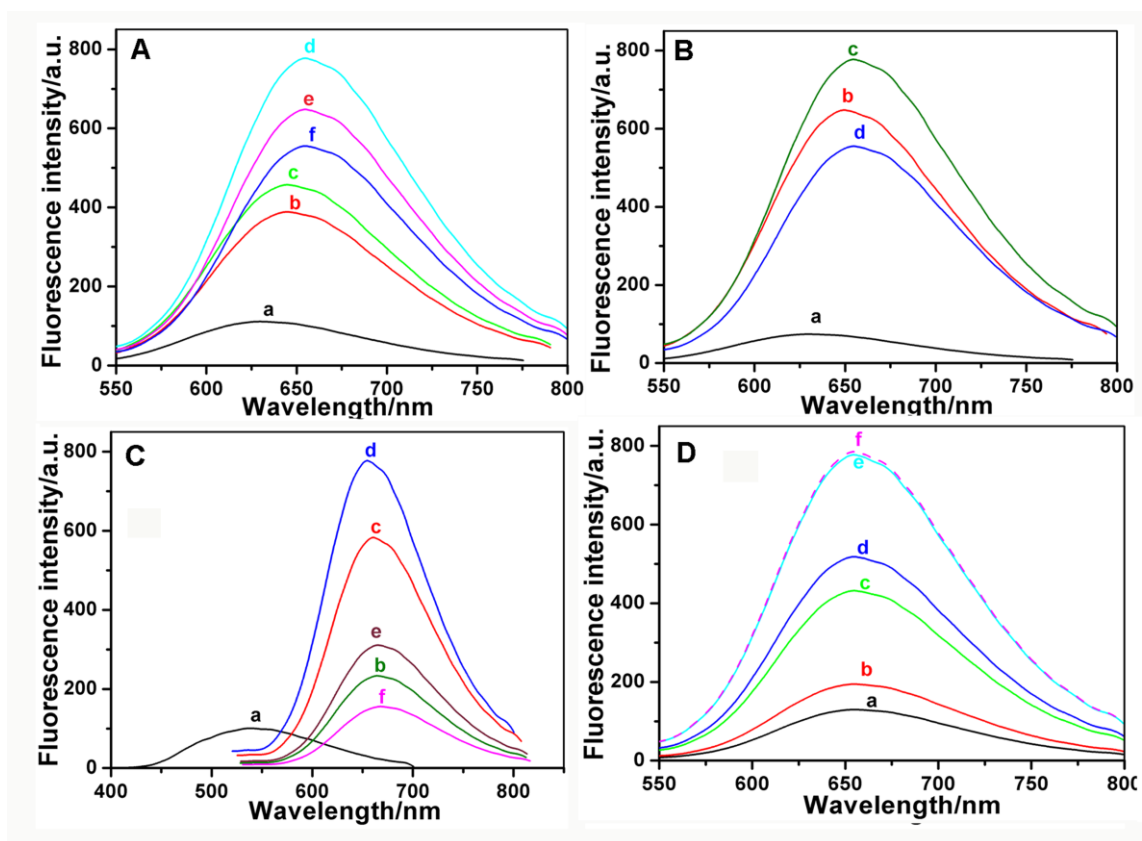

**Fig. S3.** Fluorescence decay curve of CdS-Ag<sub>2</sub>S QDs after interaction with H<sub>2</sub>O<sub>2</sub>.

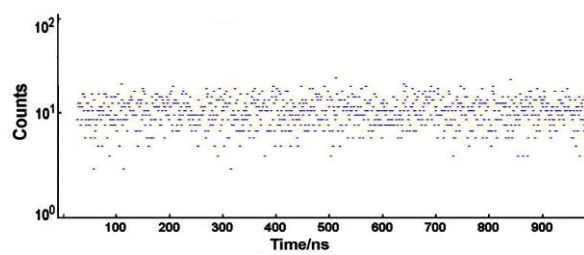

**Fig. S4.** The TEM images (a, b) and the HRTEM (c) image of CdS-Ag<sub>2</sub>S QDs after interaction with H<sub>2</sub>O<sub>2</sub>.

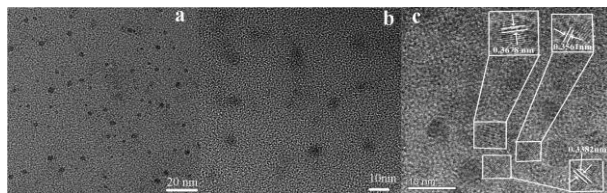

**Fig. S5.** The pH value of PBS on the relative fluorescence quenching intensity, plot of the luminescence ratio  $(I_{F0}-I_F)/I_{F0}$  versus  $\lg C$  at different pH values.

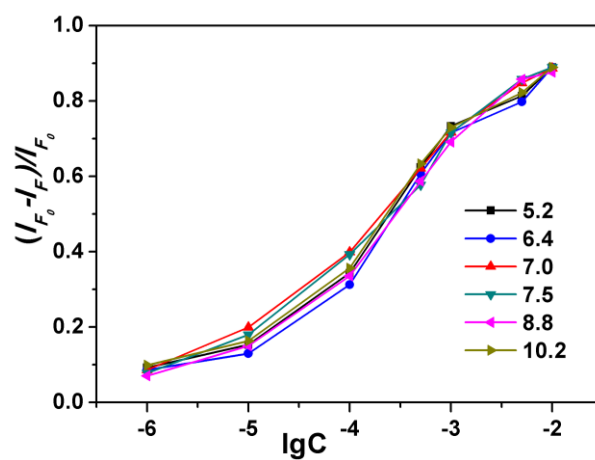

Supplement: c2ay26063h.pdf [file c2ay26063h.pdf]
